# Supplementary material for: Antibody variable sequences have a pronounced effect on cellular transport and plasma half-life
Source: PubMed Central journal article supplement — iScience. 2022 Jan 10;25(2):103746. doi: 10.1016/j.isci.2022.103746 (PMC8800109; doi:10.1016/j.isci.2022.103746), 2022-01-10
Supplement: mmc1.pdf [file mmc1.pdf]

## **Supplemental information**

### **Antibody variable sequences have a pronounced effect on cellular transport and plasma half-life**

**Algirdas Grevys, Rahel Frick, Simone Mester, Karine Flem-Karlsen, Jeannette Nilsen, Stian Foss, Kine Marita Knudsen Sand, Thomas Emrich, Jens Andre Alexander Fischer, Victor Greiff, Inger Sandlie, Tilman Schlothauer, and Jan Terje Andersen**

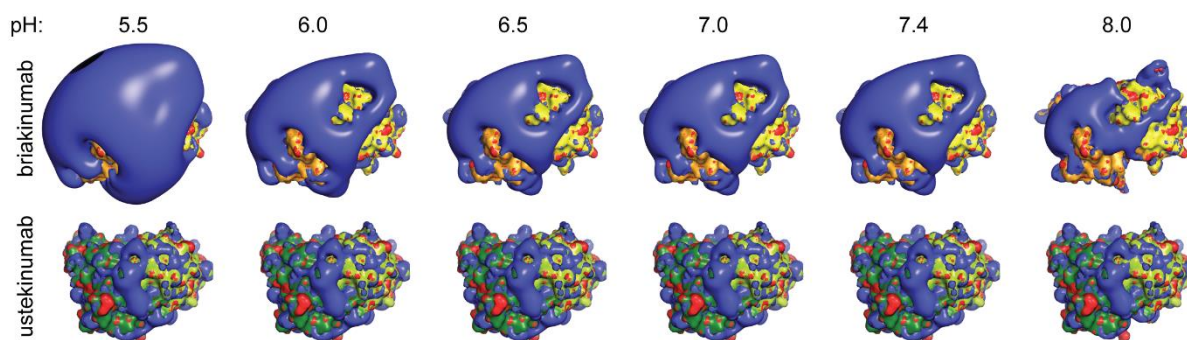

1

2 **Figure S1. Changes in charge distribution of top oriented ustekinumab and briakinumab**

3 **Fv through a pH range from 5.0 to 9.0, related to Figure 1. The HCs of ustekinumab and**

4 **briakinumab are shown in green and orange, and the LCs of ustekinumab and briakinumab are**

5 **coloured in light green and yellow, respectively. The blue colour indicates positive charge, the**

6 **red – negative charge.**

7

8

9

10

11

12

13

14

15

16

17

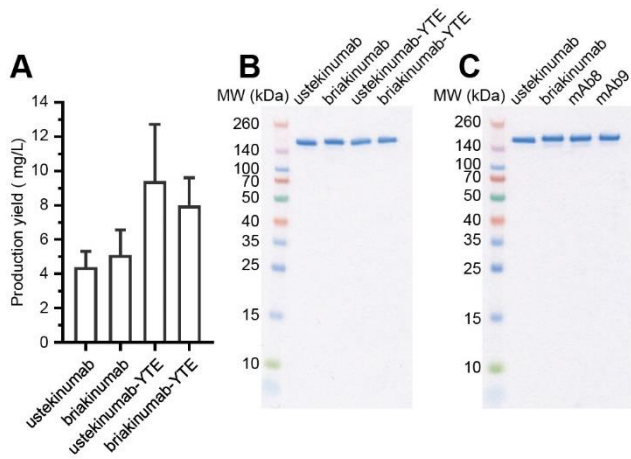

18

19 **Figure S2. Production and integrity of ustekinumab and briakinumab variants, related to**  
 20 **Figure 2.** (A) An average yield of recombinant ustekinumab and briakinumab variants  
 21 produced from transient transfection of HEK293E cells. Data are presented as mean  $\pm$  s.d. From  
 22 three independent production of IgG variants. (B and C) Non-reducing SDS-PAGE analysis of  
 23 ustekinumab and briakinumab variants.

24

25

26

27

28

29

30

31

32

33

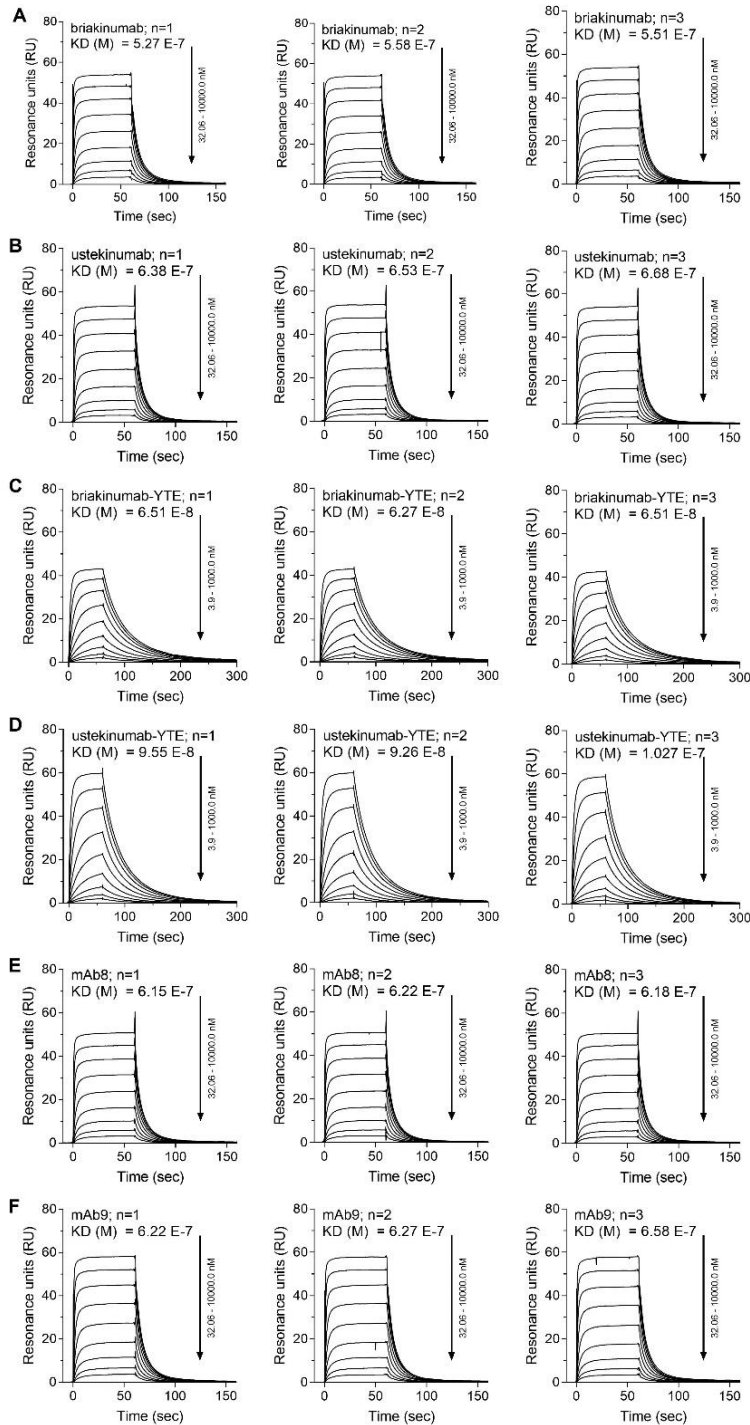

34

35 **Figure S3. SPR measurement of IgG binding to hFcRn, related to Figure 2.** Representative  
 36 sensorgrams showing binding of titrated amounts of monomeric hFcRn injected over  
 37 immobilized (100 RU) (A) briakinumab, (B), ustekinumab (C), briakinumab-YTE (D),  
 38 ustekinumab-YTE (E) mAb8 and (F) mAb9 at pH 5.5. The obtained sensorgrams were fitted  
 39 to the Langmuir 1:1 binding model. Injections were performed with a flow rate of 30  $\mu\text{l}/\text{min}$  at  
 40 25  $^{\circ}\text{C}$ . n is indicating an individual experiment.

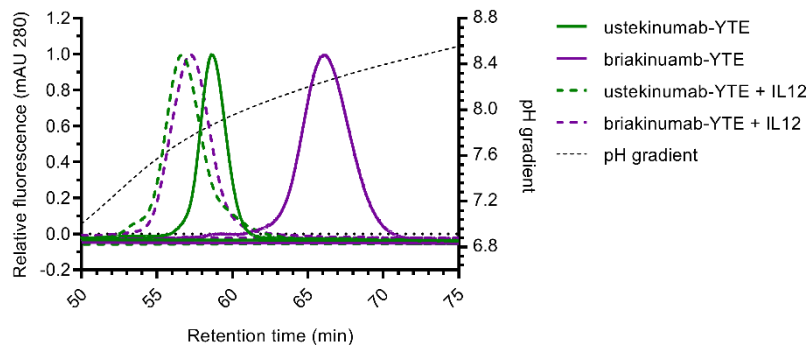

41

42 **Figure S4. Analytical hFcRn affinity chromatography, related to Figure 2.** Ustekinumab-  
 43 YTE and briakinumab-YTE were applied as monomeric fractions and in complex with IL-12.  
 44 The elution profiles are shown as relative fluorescence intensity and a function of the pH  
 45 gradient. Fluorescence intensity was normalised and set to one for the clarity. Data are shown  
 46 as one representative experiment out of three.

47

48

49

50

51

52

53

54

55

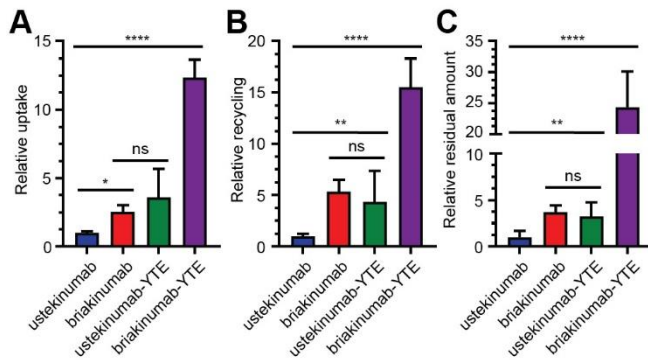

56

57 **Figure S5. HERA screening of ustekinumab, briakinumab and their respective YTE**  
 58 **mutants, related to Figure 4. (A)** Relative uptake of WT and Fc-engineered hIgG<sub>1</sub> variants  
 59 when 400 nM of each variant was added to the cells followed by 4 h incubation, washing and  
 60 lysis of the cells. **(B)** Relative recycling of the Fc-engineered hIgG<sub>1</sub> variants when 400 nM of  
 61 each variant was added to the cells and incubated for 4 h followed by extensive washing and  
 62 additional overnight incubation before sample collection. **(C)** Relative residual amount of WT  
 63 and Fc-engineered hIgG<sub>1</sub> variants. The same procedure as in **(B)** followed by lysis of the cells.  
 64 The amounts of IgG<sub>1</sub> variants in all samples were quantified by ELISA and obtained data are  
 65 shown as mean ± s.d. of three independent experiments performed in (a-d) triplicates. ns - not  
 66 significant, \**p* < 0.05, \*\**p* < 0.01, \*\*\**p* < 0.001 and \*\*\*\**p* < 0.0001, by one-way ANOVA  
 67 (Turley's multiple comparison test).

68

69

70

71

72

73

74

75

76

77

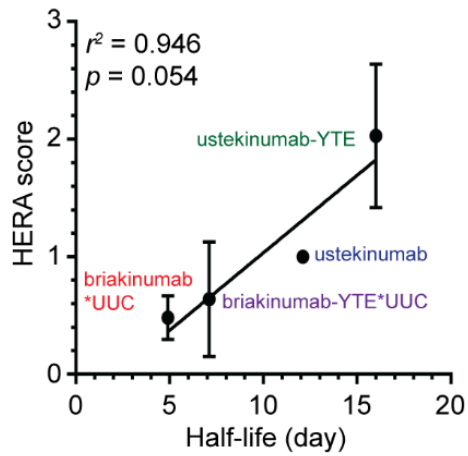

78

79 **Figure S6. Correlation of the derived HERA scores with plasma half-life values obtained**  
 80 **from hFcRn transgenic mice, related to Figure 4.** Data from Figure 4 was used to calculate  
 81 correlation between HERA score and half-life values. Data is represented as mean  $\pm$  s.d.

82

83

84

85

86

87

88

89

90

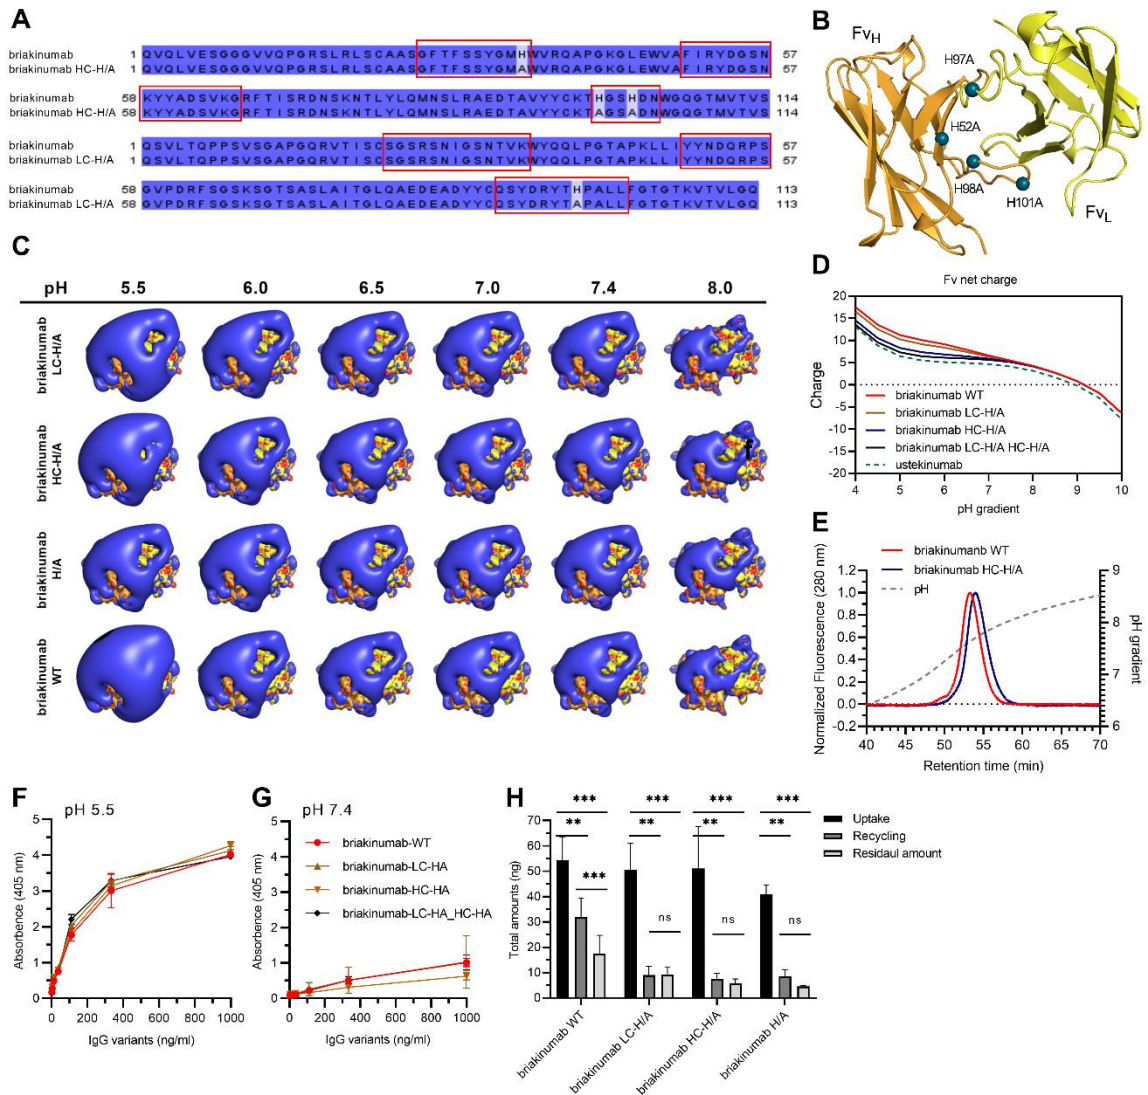

91

92 **Figure S7. Fv-engineering of briakinumab modulates binding to FcRn and cellular**  
93 **uptake, related to Figure 5. (A) Sequence alignments of HC and LC of briakinumab and CDR**

94 **mutations. Conserved and non-conserved amino acid residues are marked in dark and light blue,**  
95 **respectively, while CDR sequences are highlighted by red squares. Sequence alignments have**

96 **been made by Jalview. (B) Crystal structure of top orientated briakinumab Fv showing the**  
97 **histidine residues that were substituted to alanine residues. The HC of briakinumab are shown**  
98 **in orange, and the LC of are coloured in yellow, respectively. (C) The charge distribution of**

99 **top oriented Fv of briakinumab LC-H/A, briakinumab HC-H/A, briakinumab H/A and**  
100 **briakinumab WT throughout the pH gradient from 5.5 to 8.0. The blue and red colours indicate**  
101 **positive and negative charges, respectively. (D) Sequence-based calculation of net charge**

102 **through pH range of Fv of briakinumab, briakinumab LC-H/A, briakinumab HC-H/A and**  
103 **briakinumab H/A. Sequence alignments have been made by Jalview. The figures were designed**  
104 **using PyMOL ([www.pymol.org](http://www.pymol.org)) with the crystallography data of human IgG1 and net charges**



105 were calculated with Emboss iep ([www.bioinformatics.nl](http://www.bioinformatics.nl)). (E) Analytical hFcRn affinity  
106 chromatography of briakinumab WT and briakinumab HC-H/A as monomeric fractions. The  
107 elution profiles are shown as relative fluorescence intensity and as a function of pH gradient.  
108 Fluorescence intensity was normalised and set to one for the clarity. Data are shown as one  
109 representative experiment out of three. (F-G) ELISA binding of titrated amounts (0.5-1,000.0  
110 ng/ml) of, briakinumab WT, briakinumab LC-H/A, briakinumab HC-H/A and briakinumab  
111 H/A to hFcRn at pH (f) 5.5 and (G) 7.4. Data are mean  $\pm$  s.d. of one representative experiment  
112 out of three. (H) HERA results of briakinumab WT, briakinumab LC-H/A, briakinumab HC-  
113 H/A and briakinumab H/A when 400 nM of each variant was added to the cells followed by 3  
114 h incubation, washing and lysis of the cells. In addition, recycling sample of variants were  
115 collected when 400 nM of each variant was added to the cells and incubated for 3 h followed  
116 by extensive washing and additional 3 h incubation before sample collection. Further, cells  
117 were washed and lysed to measure the residual amount of briakinumab variants. The amounts  
118 of IgG<sub>1</sub> variants in all samples were quantified by ELISA and obtained data are shown as mean  
119  $\pm$  s.d of one representative experiment performed in triplicates out of two independent  
120 experiments. HERA data has been analysed by Two-away Anova (Tukey's multiple  
121 comparison test, \*\* $p = 0.0023$ , \*\*\* $p < 0.0001$ , ns – not significant).

122

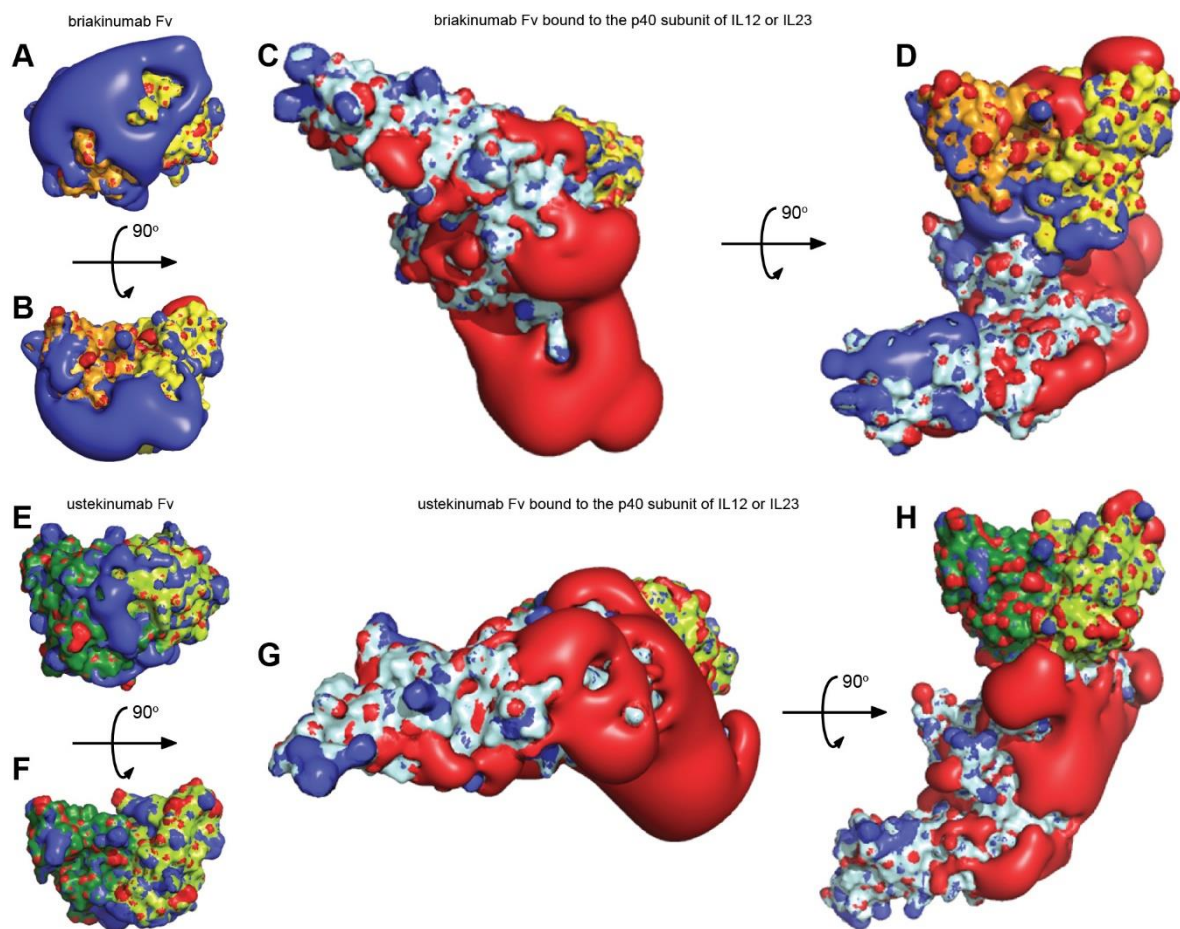

123  
 124 **Figure S8. Charge distribution of ustekinumab and briakinumab Fv alone and in complex**  
 125 **with the p40 subunit of IL12 or IL23, related to Figure 5.** The charge distribution of top  
 126 oriented (A) and (B) rotated 90° around x-axis briakinumab Fv alone or (C and D) in complex  
 127 with p40 subunit of IL-12 or IL-23 at two different orientation. The charge distribution of top  
 128 oriented (E) and (F) rotated 90° around x-axis ustekinumab Fv alone or (G and H) in complex  
 129 with p40 subunit of IL12 or IL23 at two different orientations. Charge distribution was  
 130 calculated at pH 7.4. The crystal structures of ustekinumab Fab (3HMW), briakinumab Fab  
 131 (5N2K), ustekinumab-IL-12 complex (3HMX) and briakinumab-IL23 complex (5NJD) have  
 132 been used to calculate charge distribution. The p40 subunit of IL-12 and IL-23 was used without  
 133 p35 and p19 subunits for clarity, respectively. Blue colour indicates positive charge, red –  
 134 negative charge. The HCs of ustekinumab and briakinumab are shown in green and orange, and  
 135 the LCs of ustekinumab and briakinumab are coloured in light green and yellow, while p40  
 136 subunit of IL-12 or IL-23 is shown in light grey, respectively.

137

138 **Table S1. Protein sequences of ustekinumab and briakinumab Fv domains were used for**  
 139 **net charge calculation, related to Figure 1 and 5.** CDR loops of both antibodies were defined  
 140 by Rosetta. Antibodies framework sequences are a variable domain sequence without CDRs.

| <b>CDRs</b>               | <b>ustekinumab</b>                                                                        | <b>briakinumab</b>                                                                        |
|---------------------------|-------------------------------------------------------------------------------------------|-------------------------------------------------------------------------------------------|
| <b>H1</b>                 | GYSFTTYWLG                                                                                | GFTFSSYGMH                                                                                |
| <b>H2</b>                 | IMSPVDSDIRYSPSFQG                                                                         | FIRYDGSNKYYADSVKG                                                                         |
| <b>H3</b>                 | RRPGQGYFDF                                                                                | HGSHDN                                                                                    |
| <b>L1</b>                 | RASQGISSWLA                                                                               | SGSRSNIGSNTVK                                                                             |
| <b>L2</b>                 | AASSLQS                                                                                   | YNDQRPS                                                                                   |
| <b>L3</b>                 | QQYNIYPYT                                                                                 | QSYDRYTHPALL                                                                              |
| <b>framework<br/>HC</b>   | EVQLVQSGAEVKKKPGESLKISCKGSWVR<br>QMPGKGLDWIGQVTMSVDKSITAYLQ<br>WNSLKASDTAMY YCARWGQGLTVTS | QVQLVESGGGVVQPGRSLRLSCAASWV<br>RQAPGKGLEWVARFTISRDN SKNTLYLQ<br>MNSLRAEDTAVYYCKTWGQGMVTVS |
| <b>framework<br/>κ LC</b> | DIQMTQSPSSLSASVGDRVTITCWYQQK<br>PEKAPKSLIYGVP SRFSGSGSGTDFLTIS<br>SLQPEDFATYYCFGQGTKLEIKR | QSVLTQPPSVSGAPGQRVTISCWYQQLP<br>GTAPKLLIYGVPDRFSGSKSGTSASLAI<br>GLQAED EADYYCFGTGKVTVLGQ  |

141

142

143

144

145

146

147

148

149

150

151

152 **Table S2. Binding kinetics derived from SPR analysis, related to Figure 2 and Figure S3.**

| hIgG <sub>1</sub> variants <sup>a</sup> | k <sub>a</sub> (10 <sup>5</sup> M <sup>-1</sup> s <sup>-1</sup> ) | k <sub>d</sub> (10 <sup>-2</sup> s <sup>-1</sup> ) | K <sub>D</sub> <sup>b</sup> (nM) | Chi <sup>2c</sup> |
|-----------------------------------------|-------------------------------------------------------------------|----------------------------------------------------|----------------------------------|-------------------|
| ustekinumab                             | 2.0 ± 0.1                                                         | 13.3 ± 0.2                                         | 653.0                            | 0.4               |
| briakinumab                             | 2.0 ± 0.1                                                         | 10.9 ± 0.1                                         | 545.2                            | 0.7               |
| ustekinumab-YTE                         | 2.7 ± 0.3                                                         | 0.3 ± 0.0                                          | 95.5                             | 0.2               |
| briakinumab-YTE                         | 3.3 ± 0.1                                                         | 0.2 ± 0.0                                          | 64.0                             | 0.2               |
| mAb8                                    | 2.1 ± 0.0                                                         | 12.9 ± 0.1                                         | 616.9                            | 0.4               |
| mAb9                                    | 1.9 ± 0.1                                                         | 12.1 ± 0.1                                         | 636.2                            | 0.6               |

153 <sup>a</sup>. The hIgG<sub>1</sub> variants were immobilized on CM5 Series S sensor chips (~100 RU) and two-fold serial dilutions of  
 154 his-tagged hFcRn were injected at pH 5.5.

155 <sup>b</sup>. The kinetic rate constants were obtained using a Langmuir 1:1 bimolecular binding model. The kinetic values  
 156 represent the mean ± s.d. of triplicates.

157 <sup>c</sup>. Chi<sup>2</sup> is a measure of the average squared residual.

158

159

160

161

162

163

164

165

166

167

168

169

170

171

172

173

174

175

176

177 **Supplementary Table S3. Analytical hFcRn affinity chromatography analysis, related to**  
 178 **Figures 2M-N and Figure S4.**

| hIgG1 variants     | Retention time (min) |             |             | pH value      |             |             |
|--------------------|----------------------|-------------|-------------|---------------|-------------|-------------|
|                    | start of peak        | top of peak | end of peak | start of peak | top of peak | end of peak |
| ustekinumab        | 50.7                 | 52.4        | 54.1        | 7.0           | 7.2         | 7.4         |
| briakinumab        | 53.78                | 56.8        | 60.2        | 7.40          | 7.7         | 8.0         |
| mAb8               | 54.95                | 57.1        | 59.14       | 7.4           | 7.6         | 7.7         |
| mAb9               | 53.27                | 54.7        | 56.05       | 7.2           | 7.4         | 7.5         |
| ustekinumab-YTE    | 57.1                 | 59.3        | 61.7        | 7.7           | 7.9         | 8.1         |
| briakinumab-YTE    | 64.1                 | 68.9        | 73.8        | 8.2           | 8.4         | 8.5         |
| ustekinumab + IL12 | 48.7                 | 52.3        | 56.6        | 6.8           | 7.1         | 7.5         |
| briakinumab + IL12 | 48.4                 | 51.4        | 55.0        | 6.7           | 7.0         | 7.4         |
| ustekinumab + IL12 | 54.3                 | 56.6        | 60.1        | 7.3           | 7.5         | 7.8         |
| briakinumab + IL12 | 54.7                 | 57.2        | 59.9        | 7.3           | 7.6         | 7.8         |
| YTE/KF*            | 72.6                 | 77.6        | 83.0        | 8.5           | 8.6         | 8.7         |
| KF*                | 51.8                 | 56.7        | 61.4        | 7.8           | 8.0         | 8.2         |

180 \*YTE/KF and KF are hIgG1 variants with the NIP specificity. The retention time and pH values of dissociation  
 181 of IgG1 variants from the hFcRn column have been published by Grevys et, at. Nat. Comm., 2018.
